# Supplementary material for: Heat-stability study of various insulin types in tropical temperature conditions: New insights towards improving diabetes care
Source: PLOS journal article supplement (doi:10.1371/journal.pone.0245372), 2021-02-03
Supplement: S8 (10.1371/journal.pone.0245372.s008) [file journal.pone.0245372.s008]

*Table S3: Insulin quantification values for assessing the influence of the air volume variation in the vials during 4 weeks of continuous temperature cycling between 25 and 37°C. Results are expressed as percentage of T = 0 determined values for corresponding formulations.*

| Sample                                         | Humalog      | Humalog Mix25 | Lantus        | Novorapid     | Insulatard HM |
|------------------------------------------------|--------------|---------------|---------------|---------------|---------------|
| Ref. [2-8°C]                                   | 99.6 +/- 3.5 | 99.5 +/- 2.3  | 100.0 +/- 1.3 | 100.0 +/- 2.5 | 100.3 +/- 1.2 |
| 4 weeks [25-37°C]                              | 98.8 +/- 0.3 | 98.3 +/- 2.3  | 98.5 +/- 2.0  | 99.9 +/- 1.4  | 99.2 +/- 13.5 |
| 4 weeks [25-37°C,<br>daily dose<br>simulation] | 98.5 +/- 1.7 | 97.6 +/- 3.3  | 98.2 +/- 1.8  | 100.0 +/- 2.1 | 101.6 +/- 1.8 |
