# Supplementary material for: Heat-stability study of various insulin types in tropical temperature conditions: New insights towards improving diabetes care
Source: PLOS journal article supplement (doi:10.1371/journal.pone.0245372), 2021-02-03
Supplement: S9 (10.1371/journal.pone.0245372.s009) [file journal.pone.0245372.s009]

*Table S4: Insulin quantification at T = 1, 4 and 8 weeks of continuous exposure to a temperature of 31°C, which corresponds to the median value of the temperature cycles. Values are expressed as percentage of T = 0 determined values.*

| Time    | Humalog       | Humalog Mix25 | Lantus       | Novorapid    | Insulatard HM |
|---------|---------------|---------------|--------------|--------------|---------------|
| 1 week  | 101.5 +/- 2.6 | 100.8 +/- 0.7 | 97.2 +/- 0.7 | 98.3 +/- 1.0 | 100.2 +/- 6.3 |
| 4 weeks | 91.0 +/- 1.9  | 87.5 +/- 0.9  | 86.5 +/- 0.9 | 93.2 +/- 1.0 | 94.8 +/- 5.4  |
| 8 weeks | 84.3 +/- 2.6  | 80.8 +/- 2.9  | 84.3 +/- 1.8 | 87.5 +/- 2.2 | 82.8 +/- 4.0  |
